# Supplementary material for: Overactivation of Intestinal SREBP2 in Mice Increases Serum Cholesterol
Source: PubMed Central journal article supplement (PMC3896331; doi:10.1371/journal.pone.0084221), 2014-01-20
Supplement: pone.0084221.s003.pdf [file pone.0084221.s003.pdf]

Table S2. Microarray analysis in the jejunum of ISR2 mice (TG) vs wild type littermates (CT).

| RefSeq    | Gene assignment                                                                         | Gene Symbol | Fold-Change (TG vs. CT) | p-value (TG vs. CT) |
|-----------|-----------------------------------------------------------------------------------------|-------------|-------------------------|---------------------|
|           | <b><i>Fatty acid metabolism</i></b>                                                     |             |                         |                     |
| NM_009127 | stearoyl-Coenzyme A desaturase 1                                                        | Scd1        | 79.40                   | 0.01                |
| NM_009128 | stearoyl-Coenzyme A desaturase 2                                                        | Scd2        | 48.91                   | 0.04                |
| NM_134037 | ATP citrate lyase                                                                       | Acly        | 10.41                   | 0.03                |
| NM_207625 | acyl-CoA synthetase long-chain family member 4                                          | Acsl4       | 11.15                   | 0.01                |
| NM_028817 | acyl-CoA synthetase long-chain family member 3                                          | Acsl3       | 6.20                    | 0.04                |
|           | <b><i>Cholesterol metabolism</i></b>                                                    |             |                         |                     |
| NM_146006 | lanosterol synthase                                                                     | Lss         | 27.50                   | 0.02                |
| NM_020010 | cytochrome P450, family 51                                                              | Cyp51       | 23.25                   | 0.02                |
| NM_009270 | squalene epoxidase                                                                      | Sqle        | 16.72                   | 0.02                |
| NM_138656 | mevalonate (diphospho) decarboxylase                                                    | Mvd         | 15.86                   | 0.02                |
| NM_028454 | transmembrane 7 superfamily member 2                                                    | Tm7sf2      | 14.22                   | 0.02                |
| NM_010191 | farnesyl diphosphate farnesyl transferase 1                                             | Fdft1       | 13.01                   | 0.02                |
| NM_026784 | phosphomevalonate kinase                                                                | Pmvk        | 12.94                   | 0.00                |
| NM_010476 | hydroxysteroid (17-beta) dehydrogenase 7                                                | Hsd17b7     | 11.74                   | 0.02                |
| NM_025436 | sterol-C4-methyl oxidase-like                                                           | Sc4mol      | 10.77                   | 0.04                |
| NM_023556 | mevalonate kinase                                                                       | Mvk         | 10.41                   | 0.01                |
| NM_145360 | isopentenyl-diphosphate delta isomerase                                                 | Idi1        | 9.79                    | 0.02                |
| NM_134469 | farnesyl diphosphate synthetase                                                         | Fdps        | 9.30                    | 0.04                |
| NM_010191 | farnesyl diphosphate farnesyl transferase 1                                             | Fdft1       | 9.03                    | 0.02                |
| NM_145942 | 3-hydroxy-3-methylglutaryl-Coenzyme A synthase 1                                        | Hmgcs1      | 8.51                    | 0.02                |
| NM_008255 | 3-hydroxy-3-methylglutaryl-Coenzyme A reductase                                         | Hmgcr       | 7.12                    | 0.01                |
| NM_010941 | NAD(P) dependent steroid dehydrogenase-like                                             | Nsdhl       | 6.29                    | 0.01                |
| NM_172769 | sterol-C5-desaturase (fungal ERG3, delta-5-desaturase) homolog ( <i>S. cerevisiae</i> ) | Sc5d        | 3.43                    | 0.03                |
| NM_007898 | phenylalkylamine Ca <sup>2+</sup> antagonist (emopamil) binding protein                 | Ebp         | 5.29                    | 0.02                |
| NM_053272 | 24-dehydrocholesterol reductase                                                         | Dhcr24      | 3.31                    | 0.01                |
|           | <b><i>Solute carrier family</i></b>                                                     |             |                         |                     |
| NM_172659 | solute carrier family 2 (facilitated glucose transporter), member 6                     | Slc2a6      | 3.45                    | 0.01                |
| NM_054087 | solute carrier family 19 (thiamine transporter), member 2                               | Slc19a2     | 3.22                    | 0.03                |
| NM_153150 | solute carrier family 25 (mitochondrial carrier, citrate transporter), member 1         | Slc25a1     | 3.18                    | 0.04                |
| NM_008063 | solute carrier family 37 (glucose-6-phosphate transporter), member 4                    | Slc37a4     | 1.79                    | 0.04                |
| NM_011977 | solute carrier family 27 (fatty acid transporter), member 1                             | Slc27a1     | 1.77                    | 0.04                |
| NM_011989 | solute carrier family 27 (fatty acid transporter), member 4                             | Slc27a4     | -1.57                   | 0.03                |
|           | <b><i>Lipid homeostasis</i></b>                                                         |             |                         |                     |
| NM_011125 | phospholipid transfer protein                                                           | Pltp        | 6.74                    | 0.01                |
| NM_133774 | StAR-related lipid transfer (START) domain containing 4                                 | Stard4      | 3.04                    | 0.01                |
| NM_015730 | cholinergic receptor, nicotinic, alpha polypeptide 4                                    | Chrna4      | 55.52                   | 0.01                |
| NM_153565 | proprotein convertase subtilisin/kexin type 9                                           | Pcsk9       | 10.64                   | 0.01                |
| NM_010700 | low density lipoprotein receptor                                                        | Ldlr        | 6.67                    | 0.03                |
| NM_031180 | klotho beta                                                                             | Klb         | 4.92                    | 0.01                |

|                      |                                                                               |               |       |      |
|----------------------|-------------------------------------------------------------------------------|---------------|-------|------|
| NR_033496            | low density lipoprotein receptor-related protein 8, apolipoprotein e receptor | Lrp8          | 3.36  | 0.02 |
| NM_153526            | insulin induced gene 1                                                        | Insig1        | 10.38 | 0.00 |
| <b>Miscellaneous</b> |                                                                               |               |       |      |
| NM_011147            | protein phosphatase with EF hand calcium-binding domain 1                     | Ppef1         | 59.16 | 0.02 |
| NM_178730            | transmembrane protease, serine 11f                                            | Tmprss11f     | 21.43 | 0.03 |
| NM_015763            | lipin 1                                                                       | Lpin1         | 16.96 | 0.00 |
| NM_019811            | acyl-CoA synthetase short-chain family member 2                               | Acss2         | 12.33 | 0.02 |
| NM_008615            | malic enzyme 1, NADP(+)-dependent, cytosolic                                  | Me1           | 11.26 | 0.02 |
| NM_010391            | histocompatibility 2, Q region locus 10                                       | H2-Q10        | 11.24 | 0.02 |
| NM_001033498         | GRAM domain containing 2                                                      | Gramd2        | 7.87  | 0.04 |
| NM_021557            | retinol dehydrogenase 11                                                      | Rdh11         | 7.52  | 0.02 |
| NM_021462            | MAP kinase-interacting serine/threonine kinase 2                              | Mknk2         | 6.59  | 0.03 |
| NM_008685            | nuclear factor, erythroid derived 2                                           | Nfe2          | 5.76  | 0.02 |
| NM_011921            | aldehyde dehydrogenase family 1, subfamily A7                                 | Aldh1a7       | 5.62  | 0.03 |
| NM_001177503         | RIKEN cDNA 3830431G21 gene                                                    | 3830431G21Rik | 5.50  | 0.03 |
| NM_001163427         | RIKEN cDNA 1700040I03 gene                                                    | 1700040I03Rik | 5.29  | 0.03 |
| NM_001037928         | predicted gene 11992                                                          | Gm11992       | 5.12  | 0.02 |
| NM_021446            | RIKEN cDNA 0610007P14 gene                                                    | 0610007P14Rik | 4.85  | 0.04 |
| NM_019405            | centrin 2                                                                     | Cetn2         | 4.02  | 0.04 |
| NM_008686            | nuclear factor, erythroid derived 2,-like 1                                   | Nfe2l1        | 4.01  | 0.04 |
| NM_028372            | metallo-beta-lactamase domain containing 2                                    | Mblac2        | 4.00  | 0.04 |
| NM_001081423         | tubulin tyrosine ligase-like family, member 5                                 | Ttl5          | 3.89  | 0.03 |
| NM_029730            | motile sperm domain containing 2                                              | Mospd2        | 3.70  | 0.02 |
| NM_172734            | serine/threonine kinase 38 like                                               | Stk38l        | 3.12  | 0.03 |
| NM_199308            | microtubule associated serine/threonine kinase 3                              | Mast3         | 3.09  | 0.04 |
| NM_029956            | methylmalonic aciduria (cobalamin deficiency) type B homolog (human)          | Mmab          | 3.08  | 0.02 |
| NM_198168            | protein phosphatase 2, regulatory subunit B (B56), beta isoform               | Ppp2r5b       | 2.59  | 0.01 |
| NM_013463            | galactosidase, alpha                                                          | Gla           | 2.46  | 0.04 |
| NM_031843            | dipeptidylpeptidase 7                                                         | Dpp7          | 2.42  | 0.03 |
| NM_181649            | coiled-coil domain containing 75                                              | Ccdc75        | 2.33  | 0.03 |
| NM_010497            | isocitrate dehydrogenase 1 (NADP+), soluble                                   | Idh1          | 1.93  | 0.03 |
| NM_001033271         | transmembrane protein 55b                                                     | Tmem55b       | 1.77  | 0.02 |
| NM_010431            | hypoxia inducible factor 1, alpha subunit                                     | Hif1a         | 1.75  | 0.04 |
| NM_024204            | ankyrin repeat domain 22                                                      | Ankrd22       | 1.60  | 0.04 |
| NM_007764            | v-crk sarcoma virus CT10 oncogene homolog (avian)-like                        | Crkl          | 1.59  | 0.03 |
| NM_015774            | ERO1-like (S. cerevisiae)                                                     | Ero1l         | 1.47  | 0.01 |
| NM_021885            | tubby candidate gene                                                          | Tub           | -1.16 | 0.02 |
| ENSMUST00000057551   | stem-loop binding protein                                                     | Slbp          | -1.22 | 0.05 |
| NM_010719            | lipase, hormone sensitive                                                     | Lipe          | -1.47 | 0.02 |
| NM_025700            | phosphoglucomutase 1                                                          | Pgm1          | -1.90 | 0.05 |
